# Supplementary material
Source: Springer Nature journal article supplement (https://hal.science/hal-01290551v1/file/13567_2013_355_MOESM9_ESM.pdf)

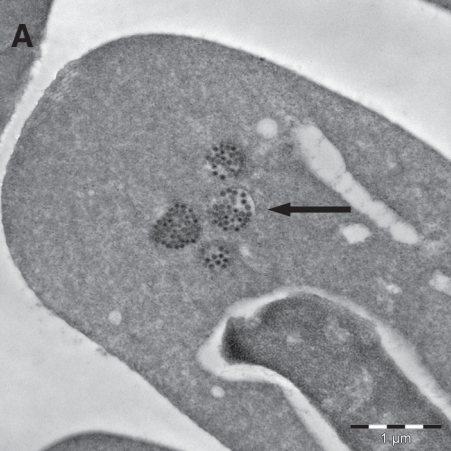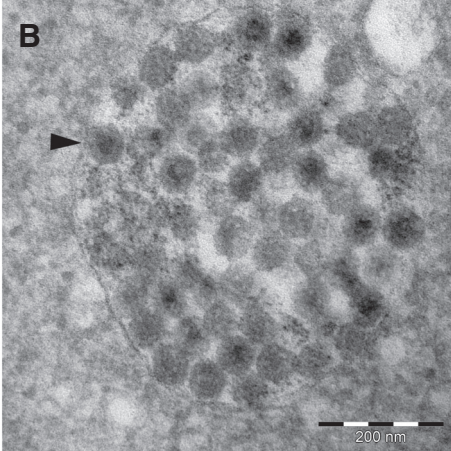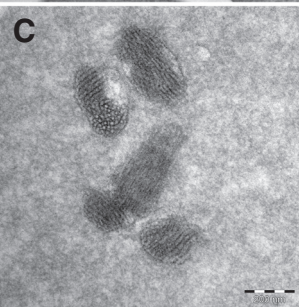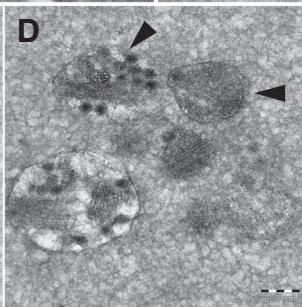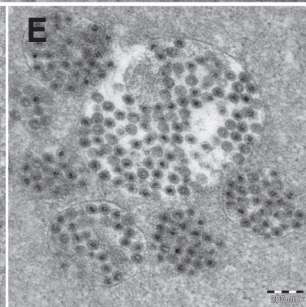

Supplement: MOESM9 [file 13567_2013_355_MOESM9_ESM.pdf]
